**Table S1.** Honey bee protein-coding genes described to be involved in behavioral maturation. Their predicted or validated 3' untranslated region (UTR) were recovered from NCBI-GenBank and used for microRNA target prediction.

| Gene (symbol)                                  | BeeBase number* | GenBank accession number | Source                                                                                                                                                                                        |
|------------------------------------------------|-----------------|--------------------------|-----------------------------------------------------------------------------------------------------------------------------------------------------------------------------------------------|
| vitellogenin (Vg)                              | GB13999         | NM_001011578.1           | Nelson et al., 2007; Marco Antonio et al., 2008; Ihle et al., 2010; Wang et al., 2010; Brito et al., 2010; Tsuruda et al., 2008; Fischer et al., 2008; Amdam et al., 2007; Amdam et al., 2006 |
| phosphoinositide-dependent kinase-1 (PDK1)     | GB15780         | XM_394208.4              | Wang et al., 2009, Wang et al., 2011; Brito et al., 2010                                                                                                                                      |
| hormone receptor-like in 46 (HR46)             | GB10650         | XM_392128.4              | Wang et al., 2009, 2010, 2011                                                                                                                                                                 |
| fushi tarazu - transcription factor (ftz-f1)   | GB16873         | XM_001122182.2           | Wang et al., 2011                                                                                                                                                                             |
| tyrosinase receptor (TYR)                      | GB17991         | NM_001011594.1           | Wang et al., 2011                                                                                                                                                                             |
| major royal jelly protein 1 (MRJP1)            | GB14888         | NM_001011579.1           | Wang et al., 2011; Jianke et al., 2010                                                                                                                                                        |
| juvenile hormone inducible protein 26 (Jhi-26) | GB19754         | XM_003249349.1           | Wang et al., 2011                                                                                                                                                                             |
| period circadian protein (Per)                 | GB19264         | NM_001011596.1           | Cheeseman et al., 2012; Naeger et al., 2011; Block et al., 2001                                                                                                                               |
| cryptochrome 2 (Cry2)                          | GB10211         | NM_001083630.1           | Cheeseman et al., 2012; Naeger et al., 2011; Toma et al., 2000                                                                                                                                |
| ultraspiracle (usp)                            | GB16648         | NM_001011634.2           | Ament et al., 2012; Velarde et al., 2006                                                                                                                                                      |
| futch                                          | GB11509         | XM_001121015.2           | Kaneko et al., 2010                                                                                                                                                                           |
| serine/threonine-protein kinase TAO1 (Tao-1)   | GB10074         | XM_396577.4              | Kaneko et al., 2010                                                                                                                                                                           |
| misexpression suppressor of KSR 2 (MESK2)      | GB18470         | XM_396456.4              | Kaneko et al., 2010                                                                                                                                                                           |
| phosphatase and tensin homolog (PTEN)          | GB14441         | NM_001162513.1           | Mutti et al., 2011                                                                                                                                                                            |
| inositol-3-phosphate synthase (Inos)           | GB11572         | XM_623374.3              | Lutz et al., 2012                                                                                                                                                                             |
| JNK interacting protein (jip)                  | GB14151         | XM_392444.4              | Lutz et al., 2012                                                                                                                                                                             |
| GB13145                                        | GB13145         | XM_392140.3              | Lutz et al., 2012                                                                                                                                                                             |
| GB30322                                        | GB30322         | XM_397038.4              | Lutz et al., 2012                                                                                                                                                                             |
| insulin-like peptide 1 (ilp1)                  | GB17332         | no info                  | Nilsen et al., 2011; Ament et al., 2008                                                                                                                                                       |
| insulin-like peptide 2 (ilp2)                  | GB10174         | NM_001177903.1           | Nilsen et al., 2011; Ament et al., 2008                                                                                                                                                       |
| major royal jelly protein 2 (MRJP2)            | GB16246         | NM_001011580.1           | Jianke et al., 2010                                                                                                                                                                           |
| major royal jelly protein 3 (MRJP3)            | GB16459         | NM_001011601.1           | Jianke et al., 2010                                                                                                                                                                           |

|                                                                              |         |                |                                                                                                                    |
|------------------------------------------------------------------------------|---------|----------------|--------------------------------------------------------------------------------------------------------------------|
| insulin receptor substrate (IRS or Chico)                                    | GB11037 | XM_391985.3    | Wang et al., 2010; Brito et al., 2010                                                                              |
| cGMP-dependent protein kinase foraging (For)                                 | GB18394 | NM_001011581.1 | Heylen et al., 2009; Fussnecker et al., 2011; Brito et al., 2010; Ben-Shahar et al., 2005; Ben-Shahar et al., 2002 |
| thioredoxin domain-containing protein 9-like                                 | GB16919 | XM_624084.2    | Calabria et al., 2008                                                                                              |
| catalase (Cat)                                                               | GB11648 | NM_001178069.1 | Williams et al., 2008                                                                                              |
| hsp70-binding protein 1-like (Hsp70)                                         | GB15809 | XM_393027.4    | Williams et al., 2008; Elekonich, 2009; Roberts and Elekonich, 2005                                                |
| krüppel homolog 1 (Kr-h1)                                                    | GB14867 | NM_001242470.1 | Grozinger et al., 2007; Fussnecker et al., 2008; Grozinger et al., 2007; Grozinger et al., 2003                    |
| juvenile hormone epoxide hydrolase (JHEH)                                    | GB10771 | XM_394922.4    | Mackert et al., 2010                                                                                               |
| insulin receptor 1 (INR1)                                                    | GB15492 | XM_394771.4    | Ament et al., 2008                                                                                                 |
| insulin receptor 2 (INR2)                                                    | GB18331 | NM_001246667.1 | Ament et al., 2008                                                                                                 |
| a/b-hydrolases 1 or carboxylesterase-6-like                                  | GB11403 | XM_391943.4    | Castillo, et al., 2012                                                                                             |
| a/b-hydrolases 2 or triacylglycerol lipase-like                              | GB13365 | XM_001122903.2 | Castillo, et al., 2012                                                                                             |
| dopamine receptor, D1 (DopR1)                                                | GB30031 | NM_001011595.1 | Liang et al., 2012                                                                                                 |
| dopamine receptor, D2 (DopR2)                                                | GB17921 | NM_001011567.1 | Liang et al., 2012                                                                                                 |
| GABA neurotransmitter transporter-1B (Gat-1B)                                | GB16752 | NM_001011643.1 | Liang et al., 2012                                                                                                 |
| GABA neurotransmitter transporter-1A (Gat-a)                                 | GB19372 | NM_001134934.1 | Liang et al., 2012                                                                                                 |
| glutamate decarboxylase 1 (Gad1)                                             | GB15745 | XM_392052.4    | Liang et al., 2012                                                                                                 |
| cysteine sulfinic acid decarboxylase-like (Black)                            | GB19363 | XM_392588.4    | Liang et al., 2012                                                                                                 |
| vesicular glutamate transporter 3-like (Vglut)                               | GB19507 | XM_394228.4    | Liang et al., 2012                                                                                                 |
| excitatory amino acid transporter 2 (Eaat-2)                                 | GB16377 | NM_001011597.1 | Liang et al., 2012; Lobo et al., 2003                                                                              |
| ionotropic glutamate receptor (Glu-R1)                                       | GB11443 | XR_120226.1    | Liang et al., 2012                                                                                                 |
| octopamine receptor (OctR1)                                                  | GB11266 | NM_001011565.1 | Liang et al., 2012                                                                                                 |
| cycle                                                                        | GB11309 | XM_001121441.2 | Naeger et al., 2011                                                                                                |
| clock                                                                        | GB17107 | XM_394233.4    | Naeger et al., 2011                                                                                                |
| timeout (Tim2)                                                               | GB13318 | XM_003250605.1 | Naeger et al., 2011                                                                                                |
| A disintegrin and metalloproteinase with thrombospondin motifs 3-like (ADAM) | GB18514 | XM_396342.4    | Brito et al., 2010                                                                                                 |
| CG5059                                                                       | GB17541 | XM_393165.4    | Brito et al., 2010                                                                                                 |
| take-out-like carrier protein or juvenile hormone binding protein (JHBP-1)   | GB19811 | NM_001011640.1 | Brito et al., 2010                                                                                                 |

|                                                                  |         |                |                         |
|------------------------------------------------------------------|---------|----------------|-------------------------|
| mapmodulin (Map)                                                 | GB14785 | XM_396725.4    | Brito et al., 2010      |
| midway (Mid or mdy)                                              | GB13792 | XM_624751.3    | Brito et al., 2010      |
| myosin regulatory light chain 2 (Mlc2)                           | GB13399 | XM_393371.4    | Brito et al., 2010      |
| Niemann-Pick Type C-2 homolog (NPC2-like)                        | GB14261 | XM_001120220.2 | Brito et al., 2010      |
| fatty acyl-CoA reductase 1-like (OAC001)                         | GB17376 | XM_001120449.2 | Brito et al., 2010      |
| phosphoinositide 3-kinase 68D (PI3K)                             | GB17429 | XM_396869.4    | Brito et al., 2010      |
| phosphatidylinositol-4-phosphate-5-kinase (PIP5K)                | GB13779 | XM_001120893.2 | Brito et al., 2010      |
| profilin (PRF)                                                   | GB13380 | NM_001011626.2 | Brito et al., 2010      |
| phospholipase A2-like (sPLA2-like)                               | GB19761 | XM_001120293.2 | Brito et al., 2010      |
| secreted protein, acidic, and rich in cysteines (SPARC)          | GB11432 | XM_623076.3    | Brito et al., 2010      |
| transferrin (Trf)                                                | GB19745 | NM_001011572.1 | Brito et al., 2010      |
| ubiquitin-specific protease 7 (Ubq)                              | GB17081 | XM_003250042.1 | Brito et al., 2010      |
| heat shock protein Hsp70Ab-like (Hsp-70-7)                       | GB19503 | NM_001160072.1 | Elekonich, 2009         |
| juvenile hormone esterase (JHE)                                  | GB15327 | NM_001011563.1 | Mackert et al., 2008    |
| malvolio (Mvl)                                                   | GB15139 | XM_623943.3    | Ben-Shahar et al., 2004 |
| histone demethylase or lysine-specific demethylase 6A-like (Utx) | GB12434 | XM_396315.4    | Grozinger et al., 2003  |
| seven-up (svp)                                                   | GB17100 | XM_392402.3    | Velarde et al., 2006    |
| tyramine beta-hydroxylase (Tbh)                                  | GB16337 | NM_001077824.1 | Lehman et al., 2006     |
| acetylcholinesterase (AChE-2)                                    | GB14873 | NM_001040230.1 | Shapira et al., 2001    |

\*Based on Official Gene Set *amel\_OGSv1.1* (previously known as "PreRelease 2") available at [http://hymenopteragenome.org/beebase/?q=download\\_sequences](http://hymenopteragenome.org/beebase/?q=download_sequences)

**Table S2.** Sequences of the most relevant honey bee mature microRNAs found in this study and used for target prediction analysis. Sequences were recovered from miRBase, release 17 (<http://www.mirbase.org>).

| <b>microRNA name</b>       | <b>microRNA mature sequence (5' - 3' )</b> |
|----------------------------|--------------------------------------------|
| ame-let-7 MIMAT0004418     | UGAGGUAGUAGGUUGUAUAGU                      |
| ame-miR-1 MIMAT0001471     | UGGAAUGUAAAGAAGUAUGGAG                     |
| ame-miR-133 MIMAT0001475   | UUGGUCCCCUUCAACCAGCUGU                     |
| ame-miR-252 MIMAT0010113   | AUAAGUACUAGUGCCGCAGGAG                     |
| ame-miR-281 MIMAT0001483   | UGUCAUGGAGUUGCUCUCUUUGU                    |
| ame-miR-3049 MIMAT0018528  | UCCGUCCAACUCCUUUCCGUCU                     |
| ame-miR-316 MIMAT0010122   | UGUCUUUUUCCGCUUUGCUGCCG                    |
| ame-miR-31a MIMAT0004428   | GGCAAGAUGUCGGCAUAGCUGA                     |
| ame-miR-3718a MIMAT0018520 | UCCCCUGUCCUGUCCCGAUAG                      |
| ame-miR-3739 MIMAT0018608  | UUGGGAGGGGGAGAGAGCAGCU                     |
| ame-miR-3745 MIMAT0018513  | CGGGUGCCACCCCCGGCCCGG                      |
| ame-miR-3749 MIMAT0018518  | UGGAAUGGCCCUUUCACCUUCCC                    |
| ame-miR-375 MIMAT0004431   | UUUGUUCGUUCGGCUCGAGUUA                     |
| ame-miR-3776 MIMAT0018553  | AGGAGGGGGGGAGAGAGAAGCG                     |
| ame-miR-3796 MIMAT0018581  | GAUCCUAAGGGGAGGAGAGGAUUU                   |
| ame-miR-750 MIMAT0018615   | CCAGAUCUAACUCUCCAGCUC                      |
| ame-miR-92a MIMAT0004435   | AUUGCACUUGUCCCGGCCUAU                      |
| ame-miR-989 MIMAT0018511   | CGUGAUGUGACGUAGUGGUUCU                     |

**Table S3.** List of 72 honey bee microRNAs undetected in this study (based on information available in miRBase release 17).

|               |               |              |              |
|---------------|---------------|--------------|--------------|
| ame-miR-1006  | ame-miR-3734  | ame-miR-3761 | ame-miR-3781 |
| ame-miR-219   | ame-miR-3737  | ame-miR-3762 | ame-miR-3782 |
| ame-miR-315   | ame-miR-3738  | ame-miR-3763 | ame-miR-3784 |
| ame-miR-318   | ame-miR-3740  | ame-miR-3764 | ame-miR-3787 |
| ame-miR-33    | ame-miR-3742  | ame-miR-3765 | ame-miR-3790 |
| ame-miR-3715  | ame-miR-3744  | ame-miR-3766 | ame-miR-3792 |
| ame-miR-3716a | ame-miR-3746  | ame-miR-3767 | ame-miR-3794 |
| ame-miR-3716b | ame-miR-3747a | ame-miR-3768 | ame-miR-3795 |
| ame-miR-3717  | ame-miR-3748  | ame-miR-3769 | ame-miR-3797 |
| ame-miR-3720  | ame-miR-3750  | ame-miR-3770 | ame-miR-3798 |
| ame-miR-3721  | ame-miR-3752  | ame-miR-3771 | ame-miR-3799 |
| ame-miR-3722  | ame-miR-3753  | ame-miR-3772 | ame-miR-3800 |
| ame-miR-3723  | ame-miR-3754  | ame-miR-3774 | ame-miR-3801 |
| ame-miR-3724  | ame-miR-3755  | ame-miR-3775 | ame-miR-928  |
| ame-miR-3725  | ame-miR-3757  | ame-miR-3777 | ame-miR-965  |
| ame-miR-3728  | ame-miR-3758  | ame-miR-3778 | ame-miR-980  |
| ame-miR-3729  | ame-miR-3759  | ame-miR-3779 | ame-miR-985  |
| ame-miR-3731  | ame-miR-3760  | ame-miR-3780 | ame-miR-9b   |

**Table S4.** Top 10 housekeeper microRNA candidates in brain and fat body tissues. By means of T test (see p-value) and Log2 ratio, expression level (Mean±SD) of each microRNA is similar between compared groups of the same tissue. However, although expression levels of the highlighted microRNAs (with black background) are similar between both tissues, they are differentially expressed according to an ANOVA comparison considering  $p < 0.05$ . The only exception is ame-miR-263, the expression of which is similar when all 4 groups were compared (ANOVA,  $p > 0.09$ ).

|                    | microRNA           | GFB <sub>r</sub> (A) |              | VF <sub>r</sub> (B)  |                | p-value<br>(A vs. B) | Log2<br>(B/A) |
|--------------------|--------------------|----------------------|--------------|----------------------|----------------|----------------------|---------------|
|                    |                    | Mean                 | SD(±)        | Mean                 | SD(±)          |                      |               |
| BRAIN              | <b>ame-miR-307</b> | <b>2,570</b>         | <b>658</b>   | <b>2,573</b>         | <b>735</b>     | <b>&gt;0.9</b>       | <b>0.00</b>   |
|                    | ame-miR-981        | 615                  | 139          | 650                  | 128            | >0.6                 | 0.08          |
|                    | <b>ame-miR-276</b> | <b>15,041</b>        | <b>3,154</b> | <b>15,982</b>        | <b>2,167</b>   | <b>&gt;0.4</b>       | <b>0.09</b>   |
|                    | <b>ame-miR-317</b> | <b>13,069</b>        | <b>2,086</b> | <b>14,047</b>        | <b>1,236</b>   | <b>&gt;0.3</b>       | <b>0.10</b>   |
|                    | <b>ame-miR-277</b> | <b>6,042</b>         | <b>582</b>   | <b>5,654</b>         | <b>857</b>     | <b>&gt;0.3</b>       | <b>-0.10</b>  |
|                    | ame-miR-2          | 5,749                | 747          | 6,314                | 805            | >0.2                 | 0.14          |
|                    | ame-miR-184        | 21,038               | 3,199        | 18,716               | 1,392          | >0.1                 | -0.17         |
|                    | ame-miR-7          | 3,416                | 1,490        | 3,042                | 1,686          | >0.4                 | -0.17         |
|                    | ame-miR-932        | 1,086                | 218          | 959                  | 319            | >0.4                 | -0.18         |
|                    | <b>ame-miR-263</b> | <b>553</b>           | <b>118</b>   | <b>627</b>           | <b>320</b>     | <b>&gt;0.7</b>       | <b>0.18</b>   |
| FAT BODY           |                    | GFF <sub>b</sub> (A) |              | VFF <sub>b</sub> (B) |                | p-value<br>(A vs. B) | Log2<br>(B/A) |
|                    |                    | Mean                 | SD(±)        | Mean                 | SD(±)          |                      |               |
|                    | <b>ame-miR-317</b> | <b>8,859</b>         | <b>846</b>   | <b>8,880</b>         | <b>1,493</b>   | <b>&gt;0.9</b>       | <b>0.00</b>   |
|                    | <b>ame-miR-307</b> | <b>10,916</b>        | <b>1,254</b> | <b>10,974</b>        | <b>2,404</b>   | <b>&gt;0.9</b>       | <b>0.01</b>   |
|                    | ame-miR-8          | 39,176               | 4,613        | 39,658               | 3,543          | >0.8                 | 0.02          |
|                    | ame-miR-252        | 1,384                | 234          | 1,360                | 153            | >0.9                 | -0.03         |
|                    | <b>ame-miR-276</b> | <b>27,282</b>        | <b>6,829</b> | <b>28,091</b>        | <b>4,561</b>   | <b>&gt;0.7</b>       | <b>0.04</b>   |
|                    | <b>ame-miR-263</b> | <b>546</b>           | <b>113</b>   | <b>528</b>           | <b>47</b>      | <b>&gt;0.8</b>       | <b>-0.05</b>  |
|                    | ame-miR-11         | 1,876                | 743          | 1,936                | 408            | >0.6                 | 0.05          |
|                    | ame-miR-87         | 5,148                | 955          | 4,912                | 571            | >0.7                 | -0.07         |
| <b>ame-miR-277</b> | <b>7,932</b>       | <b>1,228</b>         | <b>7,522</b> | <b>1,991</b>         | <b>&gt;0.5</b> | <b>-0.08</b>         |               |
| ame-miR-13b        | 2,937              | 670                  | 3,156        | 361                  | >0.4           | 0.10                 |               |
